# Supplementary material
Source: PubMed Central journal article supplement (PMC7839356)

## **Supplementary Figure Legends**

### **PPAR $\gamma$ Activation Increases HUWE1 to Attenuate NF- $\kappa$ B/p65 and Sickle Cell Disease with Pulmonary Hypertension**

Andrew J. Jang, PhD,<sup>1+</sup> Sarah S. Chang, BS,<sup>2,6+</sup> Changwon Park, PhD,<sup>3</sup> Choon-Myung Lee, PhD,<sup>4</sup> Raymond L. Benza, MD,<sup>5</sup> Michael J. Passineau, PhD,<sup>1</sup> Jing Ma, RN,<sup>2,6</sup> David R. Archer, PhD,<sup>3</sup> Roy L. Sutliff, PhD,<sup>2,6</sup> C. Michael Hart, MD,<sup>2,6</sup> and Bum-Yong Kang, PhD.<sup>2,6\*</sup>

<sup>1</sup> Cardiovascular Institute, Department of Medicine, Allegheny Health Network, Pittsburgh, PA.

<sup>5</sup> The Ohio State University Wexner Medical Center, Columbus, Ohio, <sup>2</sup> Department of Medicine, Division of Pulmonary, Allergy, Critical Care, and Sleep Medicine,

<sup>3</sup> Department of Pediatrics, <sup>4</sup> Department of Pharmacology, Emory University School of Medicine, and <sup>5</sup> Atlanta Veterans Affairs Healthcare System, Atlanta, GA.

**Supplementary Figure S1. PH develops spontaneously in SCD mice with aging.**

Right ventricular systolic pressure (RVSP) was recorded in anesthetized mice with a pressure transducer. Each bar represents the mean RVSP in mm Hg  $\pm$  SE. n=3-5. Each bar represents the mean  $\pm$  SE. \* p<0.05 vs. AA (age 7 weeks). + p<0.05 vs. SS (age 7 weeks), n=3-5.

**Supplementary Figure S2. Hemin increases HPAEC VCAM1 expression, monocyte**

**adhesion, and proliferation.** Whole lung homogenates were collected from littermate control (AA) and sickle cell (SS) mice at age 15-17 weeks. In (A), lung VCAM1 mRNA or protein levels were measured with qRT-PCR or Western blotting and expressed relative to lung mRNA (9S mRNA) or protein (GAPDH). \*p<0.05 vs AA, n=4. In (B), human pulmonary artery endothelial cells (HPAECs) were treated with dimethyl sulfoxide vehicle (CON) or hemin (HEM, 5.0  $\mu$ M) for 72 hours. Mean HPAEC VCAM1 mRNA and protein levels were measured with qRT-PCR or Western blotting. Each bar represents the mean VCAM1 level  $\pm$  SE relative to GAPDH expressed as fold-change vs. CON. \*p<0.05 vs. CON, n=11-12. In (C-D) HPAECs in a 96-well plate were treated with vehicle (CON) or hemin (HEM, 2.5, 5.0, and 10.0  $\mu$ M) for 72 hours. (C) THP1 monocytes labeled with calcein were then added ( $5 \times 10^4$  monocytes / well) and incubated for 30 min. Monolayers were then washed 3 times to remove unbound monocytes, and scanned with a plate reader to measure total fluorescence / well. Each bar represents the mean  $\pm$  SE fluorescence intensity of bound monocytes expressed as % CON. n=6. \*p<0.05 vs. CON. (D) hemin-induced HPAEC proliferation measured with BrdU assays. Each bar represents the mean  $\pm$  SE proliferation as fold change vs. CON. n=6. \*p<0.05 vs. CON.

**Supplementary Figure S3. Screening of siRNAs of HUWE1.** Human pulmonary artery endothelial cells (HPAECs) were treated with 10 nM scrambled (SCR) or siRNA duplexes to HUWE1 (siHUWE-V1 which targeted exon 44-45 region on HUWE1 protein coding sequence (CDS), siHUWE-V2 which targeted exon 36-37 region on HUWE1 CDS, or siHUWE-V2 which targeted exon 36-37 region on HUWE1 3' untranslated region (UTR)) for 72 hours. HUWE1 relative to GAPDH expressed as fold change vs. SCR.

**Supplementary Figure S4. Loss of p65 reduces ET-1 and VCAM1 levels.** In (D-G), HPAECs were treated with scrambled (SCR) or p65 (si-p65, 10 nM) siRNAs for 6 h then incubated for an additional 72 h. qRT-PCR was performed for p65 (A), ET-1 (B), or VCAM1 (C) mRNAs. Each bar represents mean  $\pm$  SE mRNA level relative to GAPDH expressed as fold-change vs cells treated with scrambled siRNA (SCR). n=3-6, \*p<0.05 vs SCR.

**Supplementary Figure S5. Loss of PPAR $\gamma$  function reduces HUWE1 and miR-98 levels.** In (A-C), human pulmonary artery endothelial cells (HPAECs) were treated with scrambled (SCR) or siRNA duplexes (10 and 20 nM) to PPAR $\gamma$  for 6 h then incubated for an additional 72 h. qRT-PCR was performed for PPAR $\gamma$  (A), HUWE1 (B) or miR-98 (C). Each bar represents mean  $\pm$  SE relative to GAPDH or RNU6B expressed as fold-change vs cells treated with scrambled siRNA (SCR). n=4-6, \*p<0.05 vs SCR.

**Supplementary Figure S6. The PPAR $\gamma$  ligand, RSG, attenuates increases in VCAM1 and endothelial dysfunction in hemin-treated HPAECs. Overexpression of miR-98 reduces increases in ET-1 in hemin-treated HPAECs.** Human pulmonary

artery endothelial cells (HPAECs) were treated with hemin (HEM, 5  $\mu$ M) for 72 h. During the final 24 h of hemin exposure, selected HPAECs were treated  $\pm$  rosiglitazone (RSG, 10  $\mu$ M). In **(A)**, qRT-PCR was performed for VCAM1 levels. Each bar represents the mean  $\pm$  SE relative to GAPDH as indicated. \* $p < 0.05$  vs. HEM/RSG(-).  $n = 6$ . In **(B)**, THP1 monocytes labeled with calcein were then added ( $5 \times 10^4$  monocytes / well) and incubated for 30 min. Monolayers were then washed 3 times to remove unbound monocytes, and scanned with a plate reader to measure total fluorescence / well. Each bar represents the mean  $\pm$  SE fluorescence intensity of bound monocytes expressed as % CON.  $n = 6$ . \* $p < 0.05$  vs. HEM/RSG(-). In **(C)**, hemin-induced HPAEC proliferation measured with BrdU assays. Each bar represents the mean  $\pm$  SE proliferation as fold change vs. CON.  $n = 6$ . \* $p < 0.05$  vs. HEM/RSG(-). In **(D)**, HPAECs were transfected with mimic-miR-98 (10 nM) or an equivalent amount of scrambled mimic-miR negative control using lipofectamine RNAiMax (Qiagen). After transfection for 6 hours, media were replaced with endothelial growth medium (EGM) containing 5% FBS. HPAECs were treated with HEM (5  $\mu$ M) and then cultured for 72 hours. Alterations in ET-1 levels were examined using qRT-PCR. Each bar represents the mean  $\pm$  SE as fold change vs. HEM/mimic miR-98(-).  $n = 6$ . \* $p < 0.05$  vs. HEM/mimic miR-98(-).

Supplementary Fig. S1

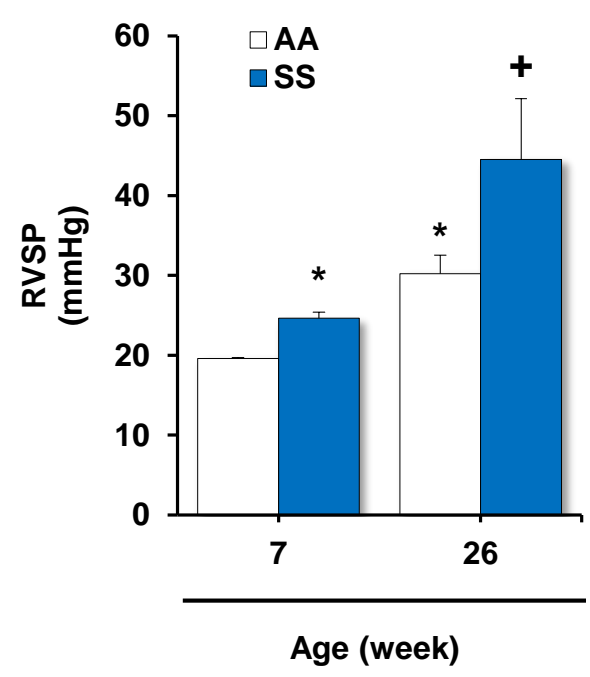

Supplementary Fig. S2

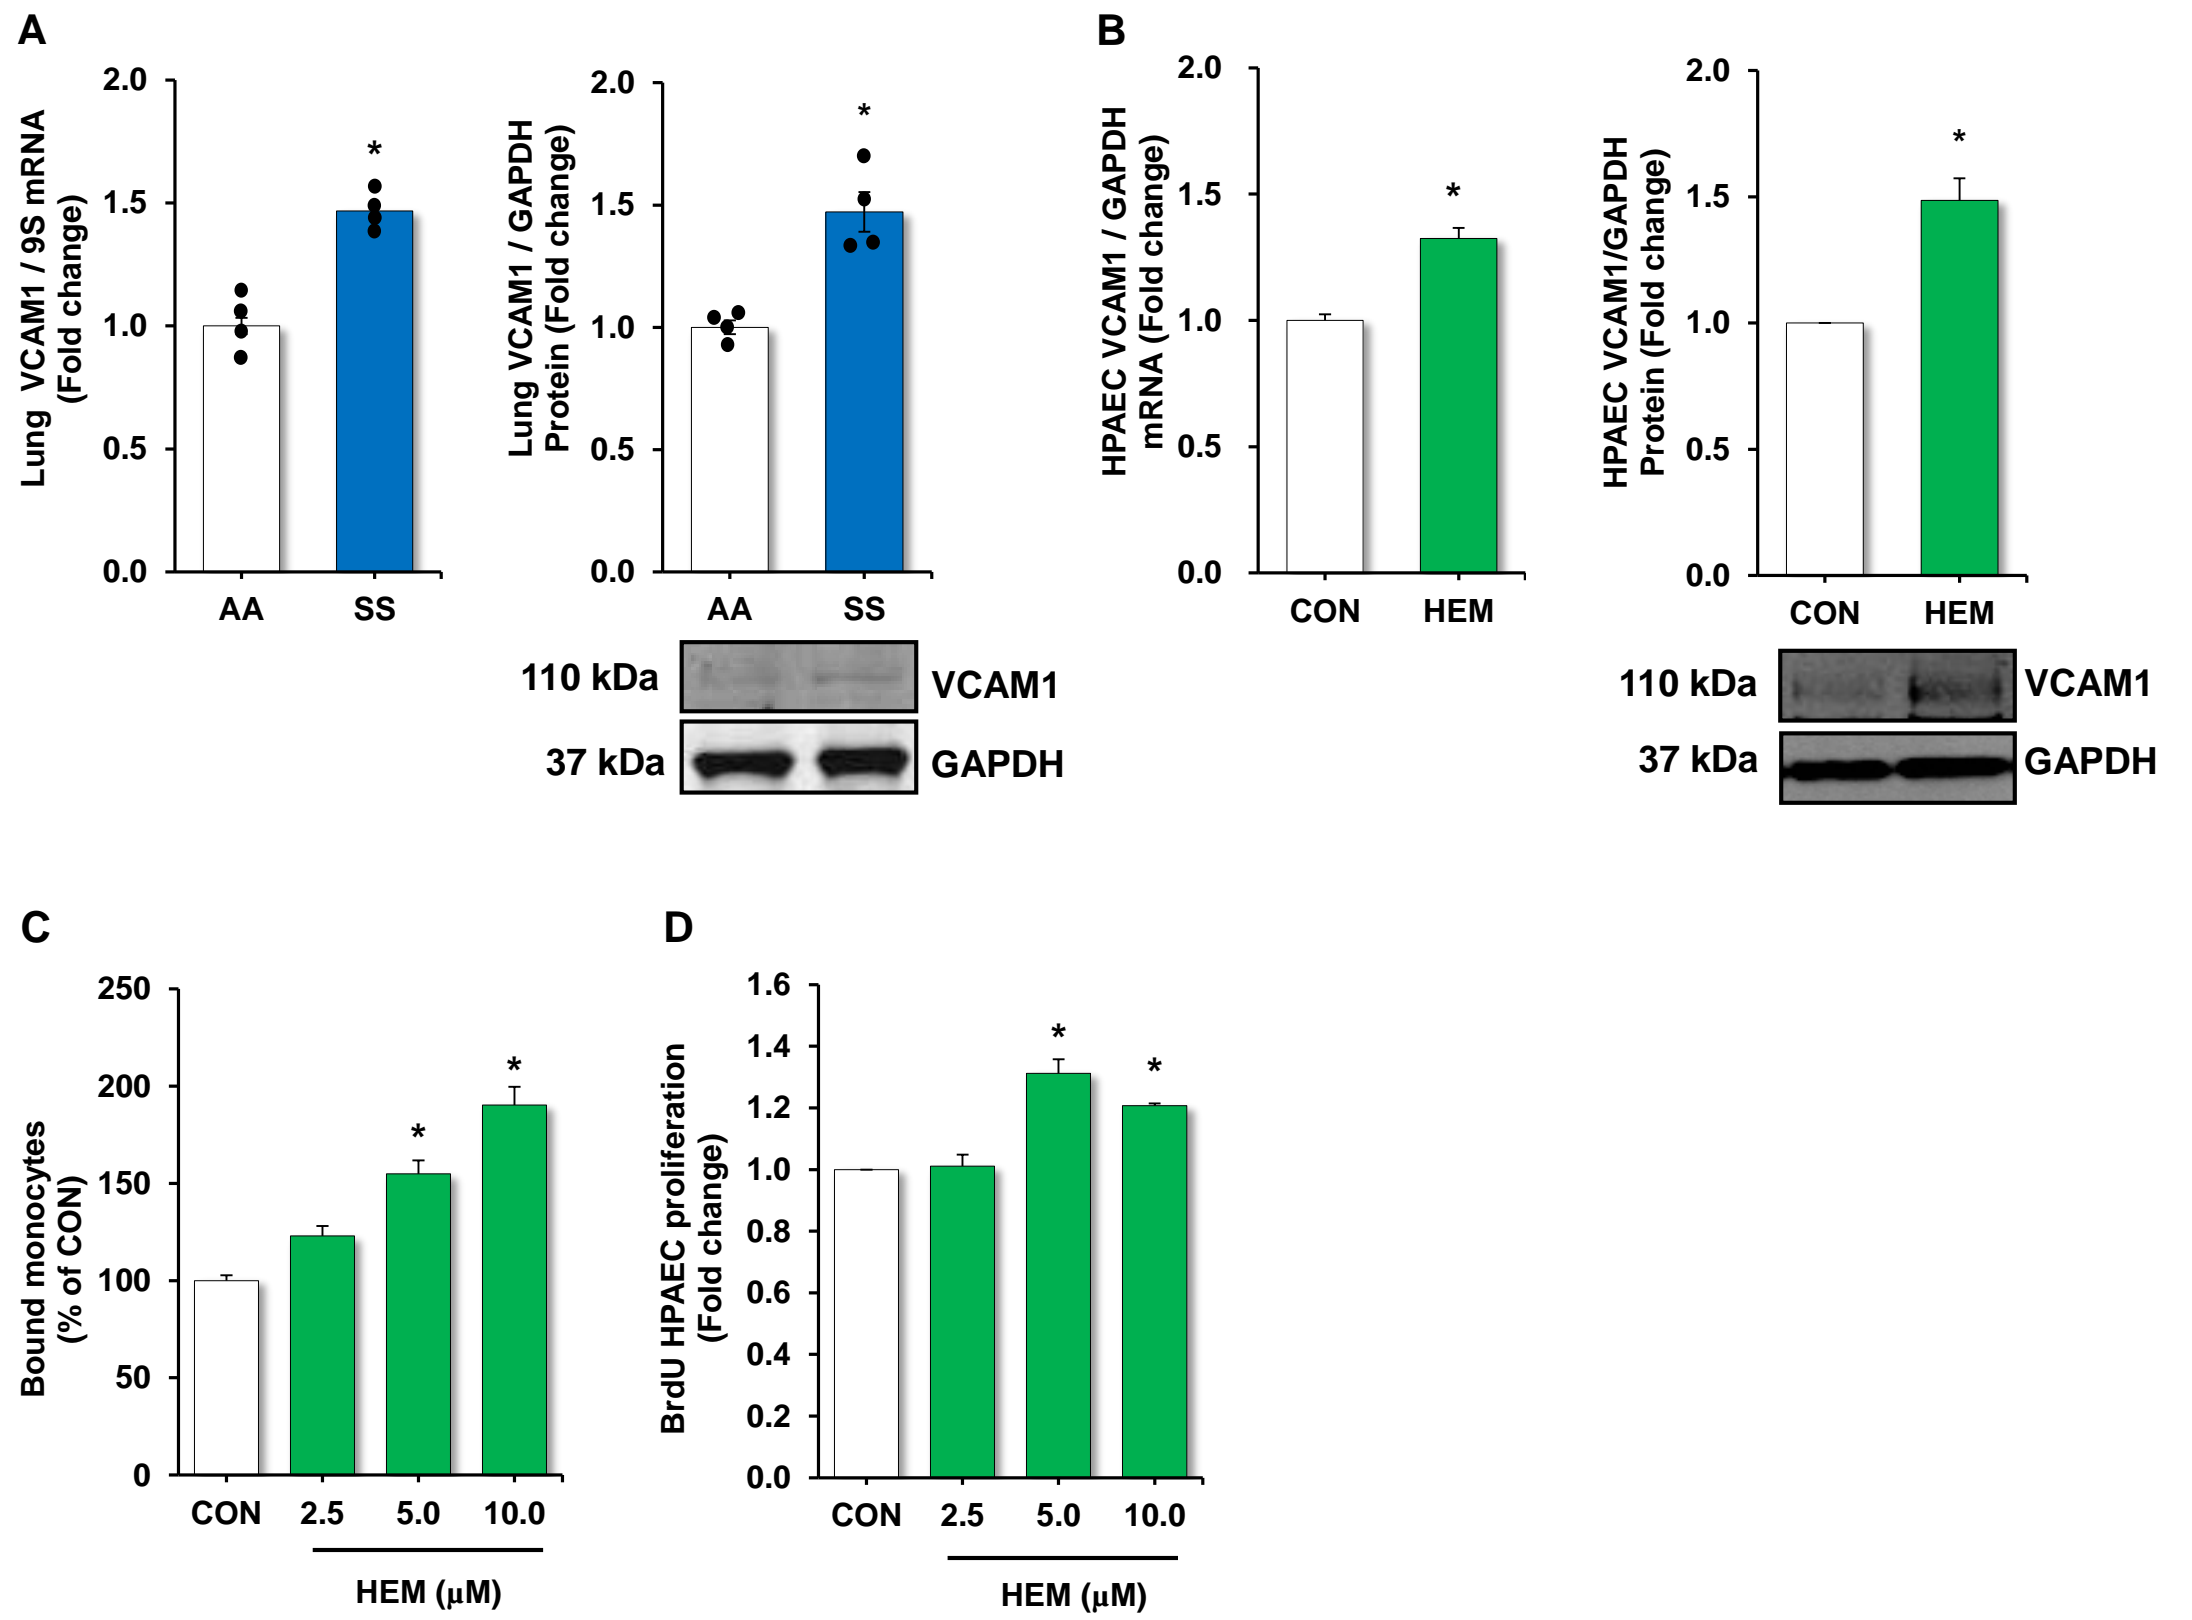

Supplementary Fig. S3

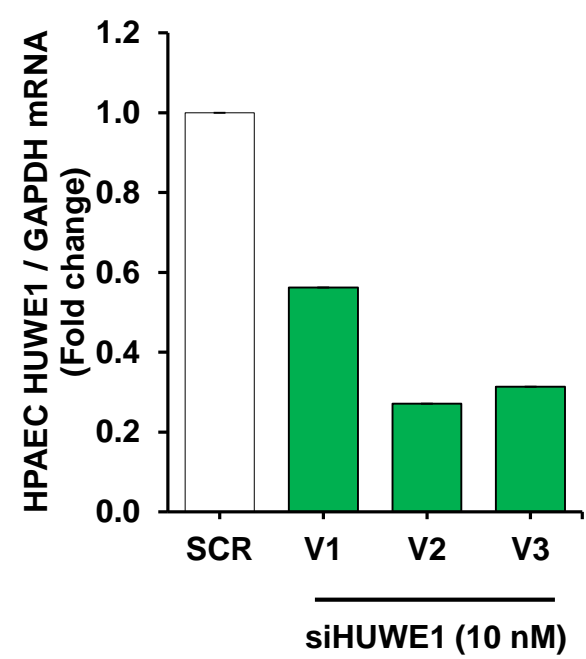

Supplementary Fig. S4

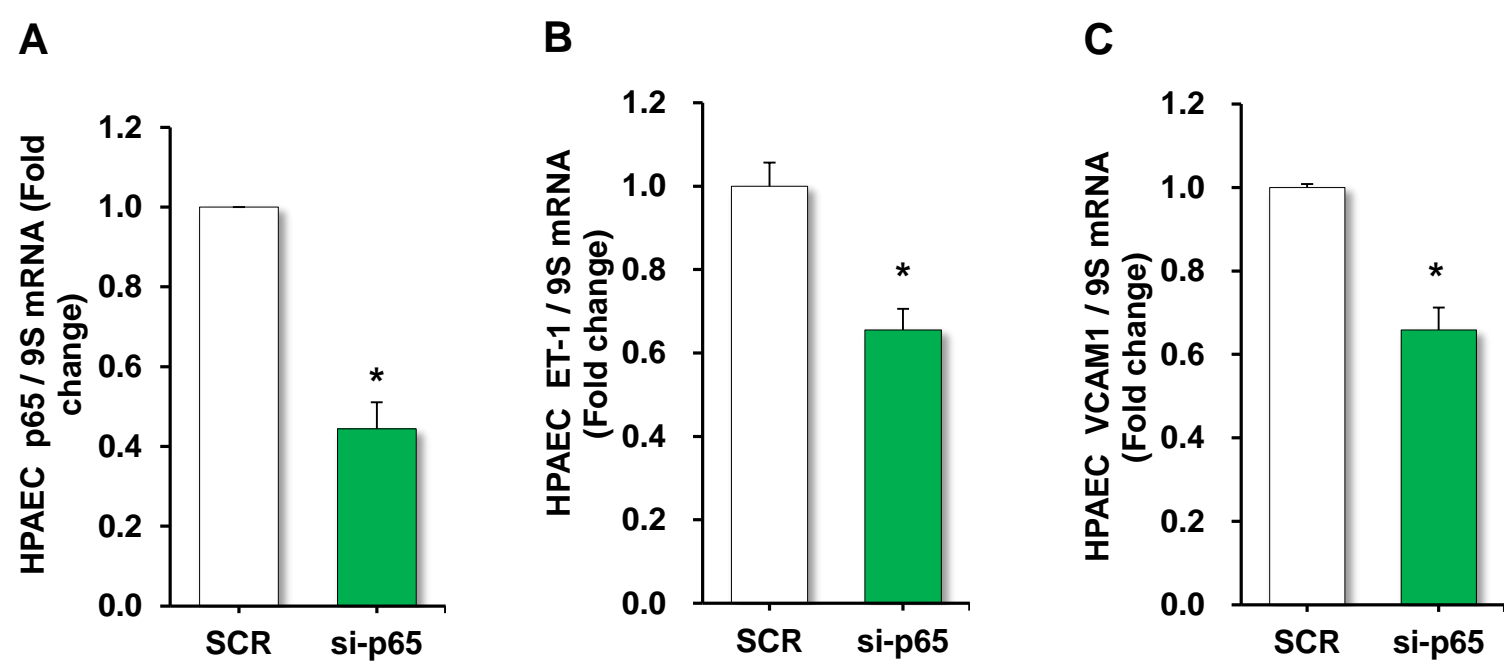



Supplementary Fig. S5

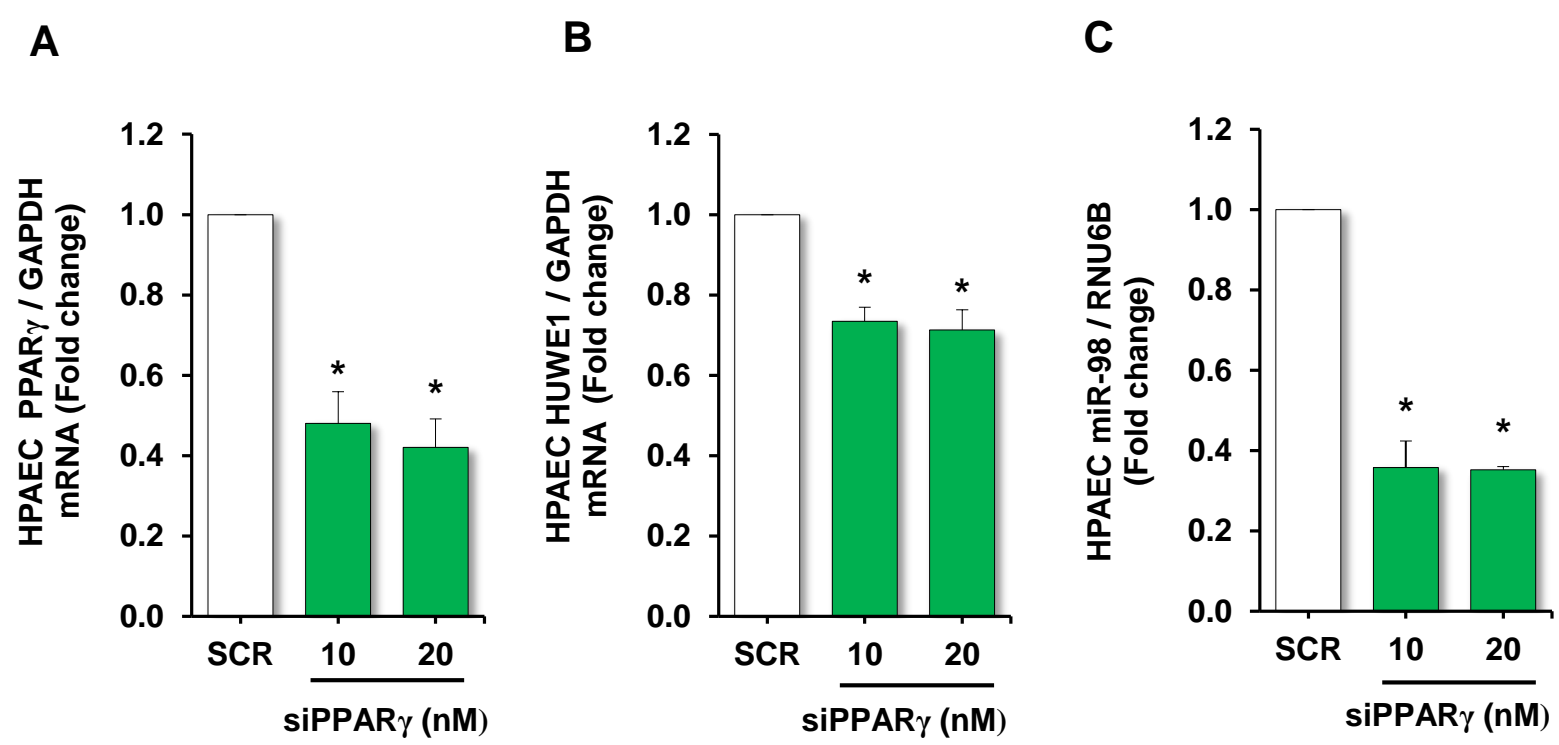

Supplementary Fig. S6

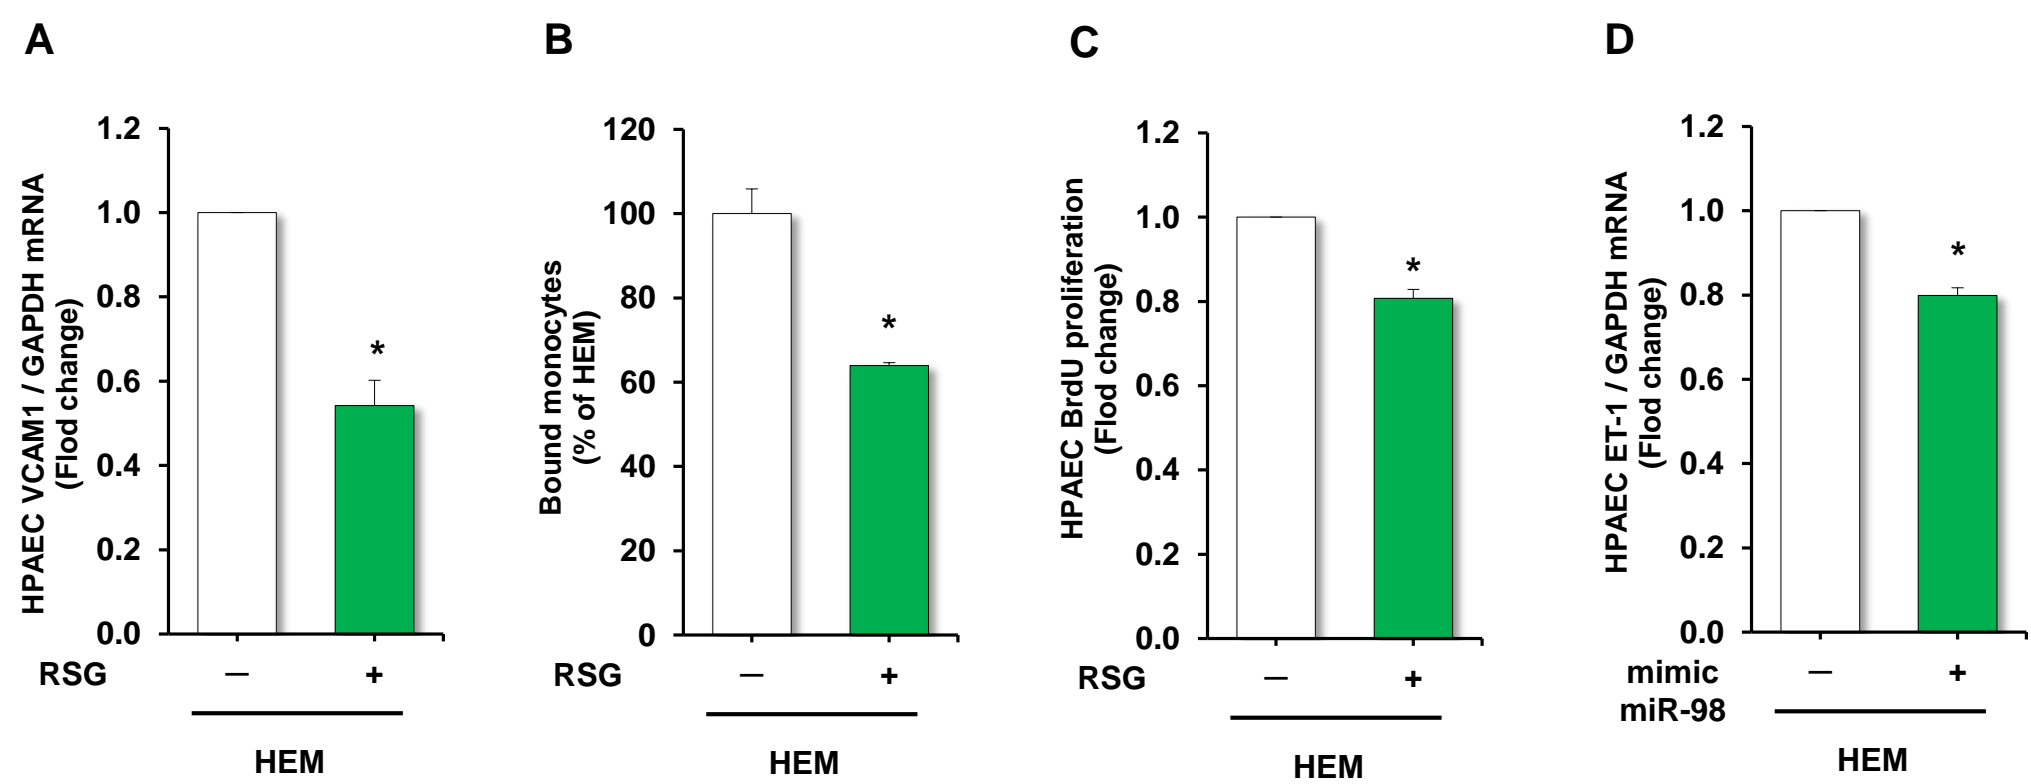

Supplement: advancesADV2020002754-suppl1.pdf [file advancesADV2020002754-suppl1.pdf]
